# Supplementary material
Source: PubMed Central journal article supplement (PMC1413824)

pUCON

G A A T T C G A G C T A T C T G A G T C G A A T A C A G T T C G A C T C G A C C T G C  
150 360 370 380 390

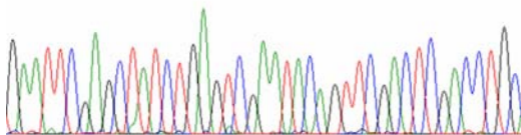

pUCG(14)

G A A T T C C G C G C G C G C G C G C G C G C G C G C G C G C G T C G A C C T G C  
3 370 380 390 400

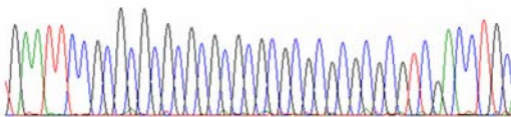

pUUY1

G G T C G A T G C G C G C G C G T G T G C G C G C G T G C G C G C G C A A T T C A C  
280 290 300 310

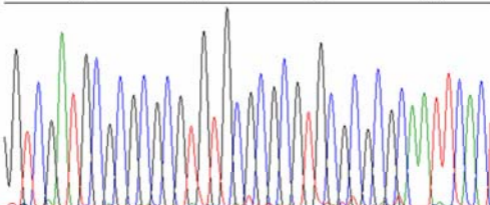

pU-RW1009

G G T C G A T T A C G C G C G C G C G T A T A T A C G C G C G C G T A A A T T C A C  
280 290 300 310

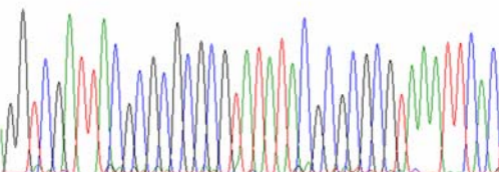

pSCON

G G A A T T C T A G A T T G C T G A A C G T G A T T C G A C T C A G A T G C G C C T T C T C G A G C T G T C  
50 60 70 80 90

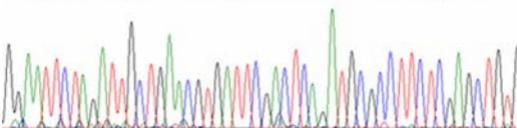

pSCG(14)

G G A A T T C C G C G C G C G C G C G C G C G C G C G C G T C G A G C T G T C  
80 90 100 110

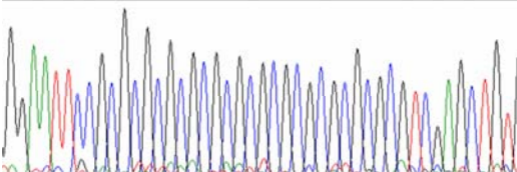

pSAT(14)

G G A A T T A T A T A T A T A T A T A T A T A T A T A T T T C G A G C T G T G  
70 80 90 100 110

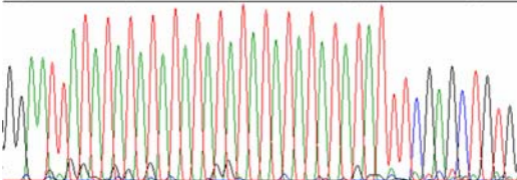

Supplement: pnas_0511084103_1.pdf [file pnas_0511084103_1.pdf]
