# Supplementary material
Source: PubMed Central journal article supplement (PMC1413824)

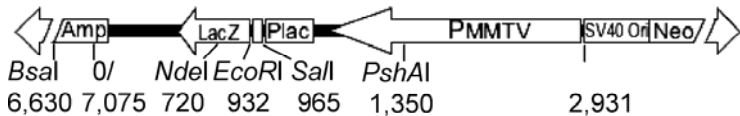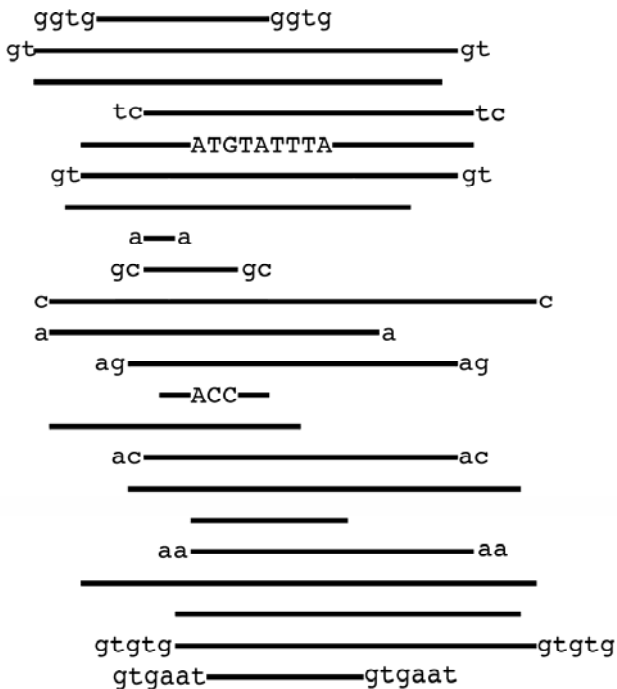

Supplement: pnas_0511084103_2.pdf [file pnas_0511084103_2.pdf]
